# Supplementary material for: Improved synthesis and photovoltaic performance of donor–acceptor copolymers based on dibenzothiophene-cored ladder-type heptacyclic units
Source: Royal Society of Chemistry journal article supplement (doi:10.1039/c5tc00398a), 2015-01-01
Supplement: c5tc00398a1.pdf [file c5tc00398a1.pdf]

## Supporting Information

### Improved synthesis and photovoltaic performance of donor-acceptor copolymers based on dibenzothiophene-cored ladder-type heptacyclic units

Lixin Wang, Dongdong Cai, Changquan Tang, Meng Wang, Zhigang Yin and Qingdong Zheng\*

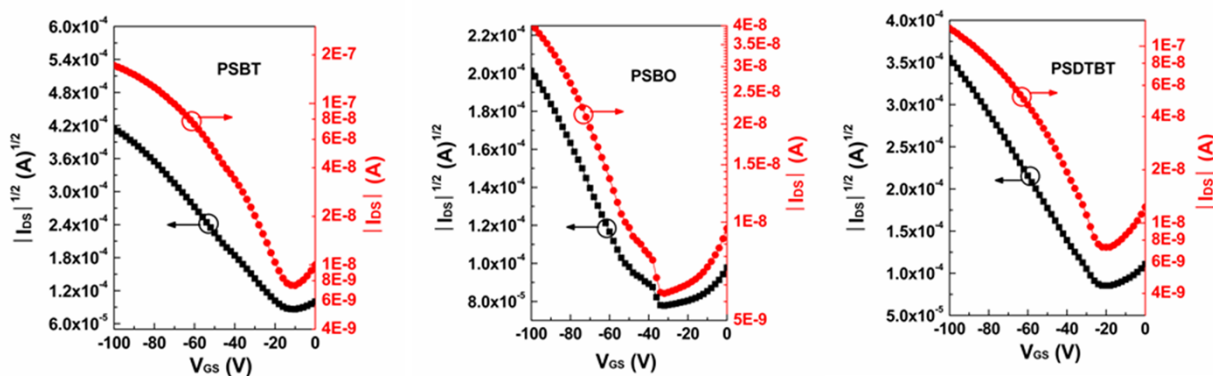

Fig. S1 Transfer curves of field-effect transistors based on PSBT (left), PSBO (middle) and PSDTBT (right).

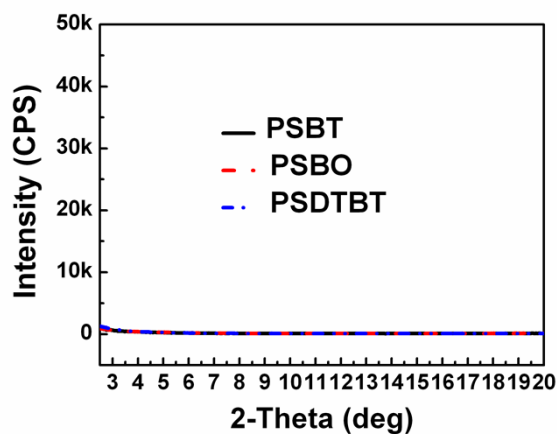

Fig. S2 XRD patterns of the pristine PSBT, PSBO, and PSDTBT thin films, spin-coated from *o*-DCB/CB = 1/3 (v/v) onto PEDOT:PSS/glass substrates.
